# Supplementary material for: Polyoxometalate driven dendrite-free zinc electrodes with synergistic effects of cation and anion cluster regulation
Source: Royal Society of Chemistry journal article supplement (doi:10.1039/d1ta00256b), 2021-01-01
Supplement: d1ta00256b1.pdf [file d1ta00256b1.pdf]

## **Polyoxometalate Driven Dendrite-free Zinc Electrode by Synergy Mechanisms of Cation and Anion Cluster Regulation**

Hai-Yang Wu,<sup>‡a</sup> Xingxing Gu,<sup>‡b</sup> Peng Huang,<sup>\*a</sup> Chuang Sun,<sup>a</sup> Hai Hu,<sup>a</sup> Yuan Zhong,<sup>a</sup>  
and Chao Lai<sup>\*a</sup>

<sup>a</sup> School of Chemistry and Materials Chemistry, Jiangsu Normal University, Xuzhou, Jiangsu, 221116, P. R. China.

<sup>b</sup> Chongqing Key Laboratory of Catalysis and New Environmental Materials, College of Environment and Resources, Chongqing Technology and Business University, Chongqing 400067, China.

## Results and Discussion

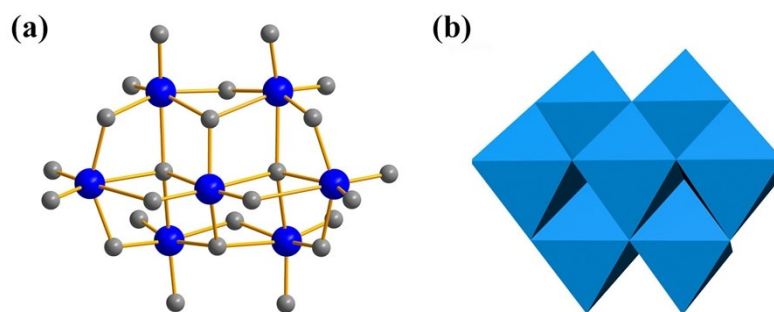

**Figure S1.** (a) Ball-and-stick presentations of  $[\text{Mo}_7\text{O}_{24}]^{6-}$  anion cluster. (Mo: blue, O: gray) (b) Polyhedral representation of  $[\text{Mo}_7\text{O}_{24}]^{6-}$  anion cluster.

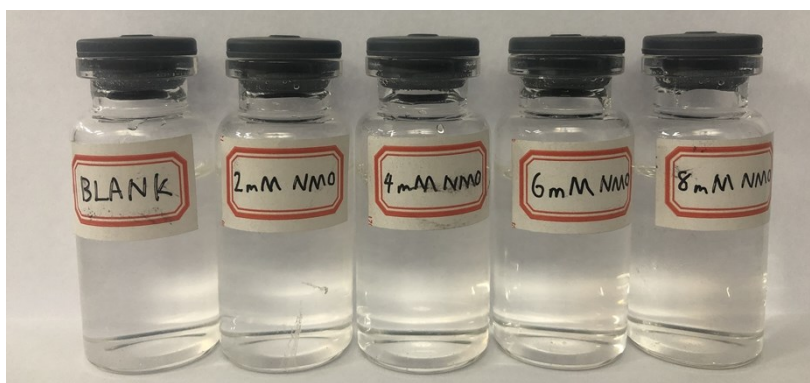

**Figure S2.** Electrolytes containing different amount of NMO.

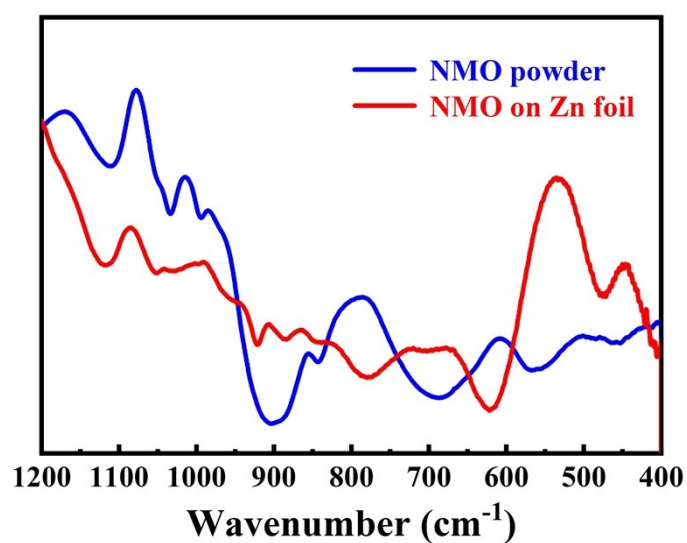

**Figure S3.** IR spectra of NMO powder and NMO adsorbed on the Zn foil.

**Table S1.** The infrared characteristic absorption peak.

| NMO Powder               |                                      | NMO on Zn foil           |                                    |
|--------------------------|--------------------------------------|--------------------------|------------------------------------|
| Peak (cm <sup>-1</sup> ) |                                      | Peak (cm <sup>-1</sup> ) |                                    |
| 564, 682                 | Mo <sup>VI</sup> -O-Mo <sup>VI</sup> | 622, 781                 | Mo <sup>V</sup> -O-Mo <sup>V</sup> |
| 843, 887                 | Mo <sup>VI</sup> -Ot                 | 844, 885                 | Mo <sup>VI</sup> -Ot               |
| 902, 994                 | Mo <sup>VI</sup> =Ot                 | 996                      | Mo <sup>VI</sup> =Ot               |
|                          |                                      | 920                      | Mo <sup>V</sup> =Ot                |

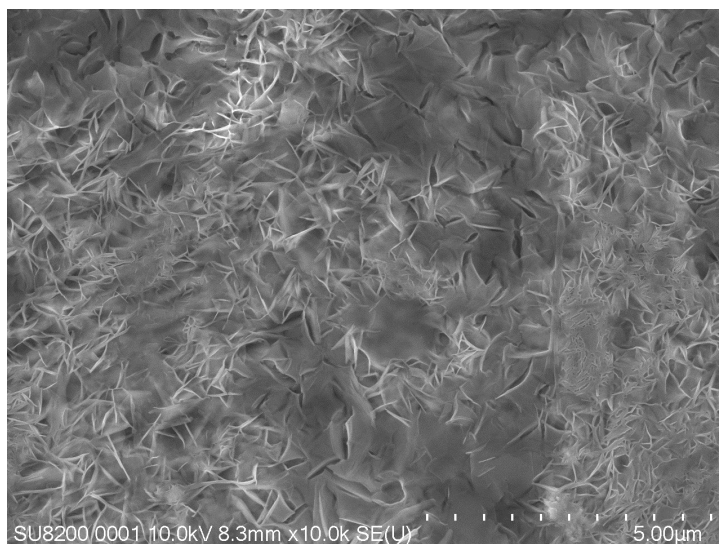

**Figure S4.** SEM images of zinc foil after immersing in the electrolyte added with 18 mM  $(\text{NH}_4)_2\text{SO}_4$  for 5 hours.

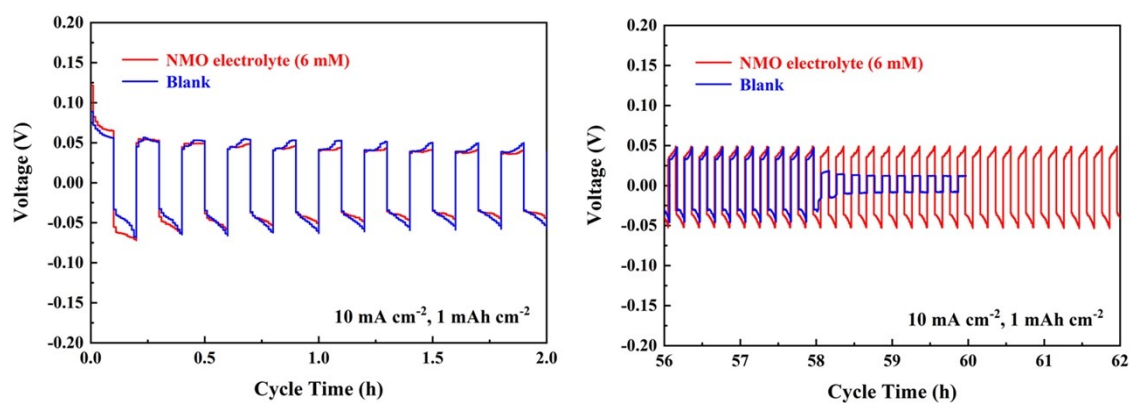

**Figure S5.** Voltage-time profiles at a current density of  $10 \text{ mA cm}^{-2}$  with a fixed capacity of  $1 \text{ mAh cm}^{-2}$ .

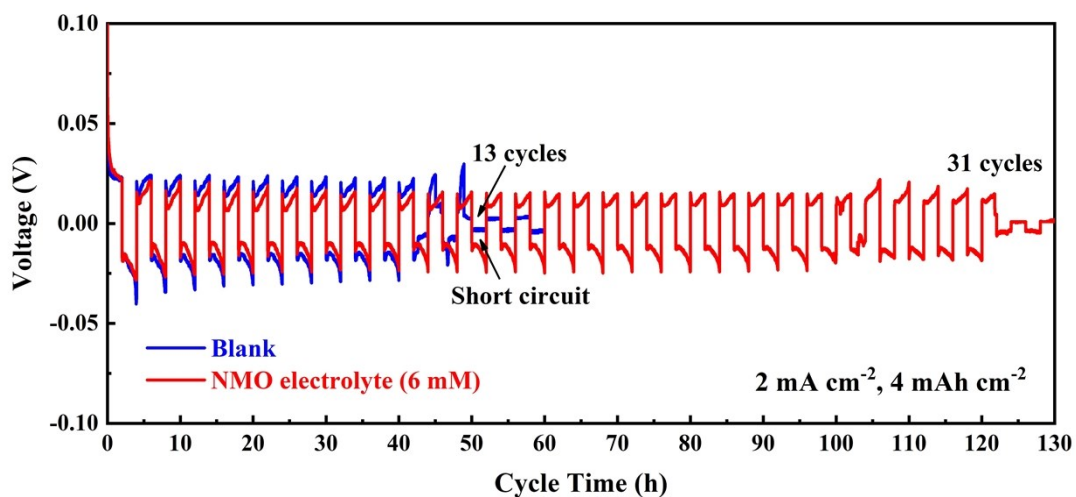

**Figure S6.** Cycling performance of Zn symmetric cells using electrolyte without or with NMO additives at current densities of  $2 \text{ mA cm}^{-2}$  with a fixed capacity of  $4 \text{ mAh cm}^{-2}$ .

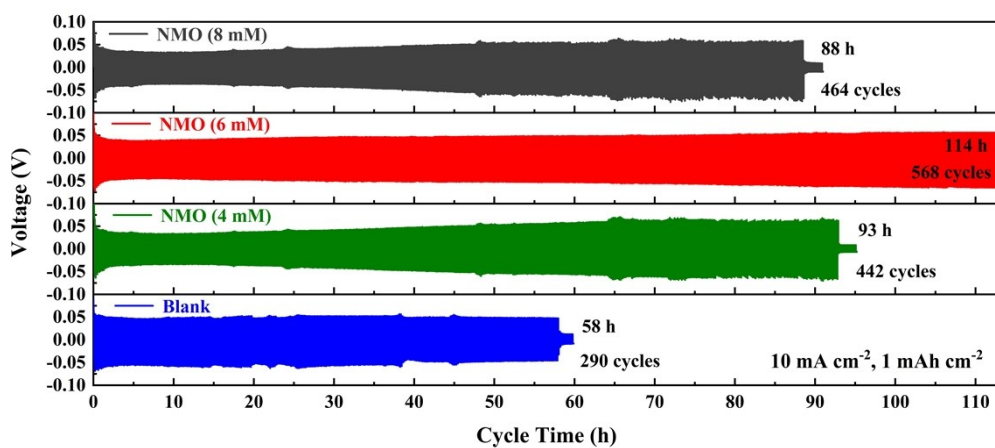

**Figure S7.** Cycling curves of Zn symmetric cells in electrolytes with different amounts of NMO additives at current densities of  $10 \text{ mA cm}^{-2}$  with a fixed capacity of  $1 \text{ mAh cm}^{-2}$ .

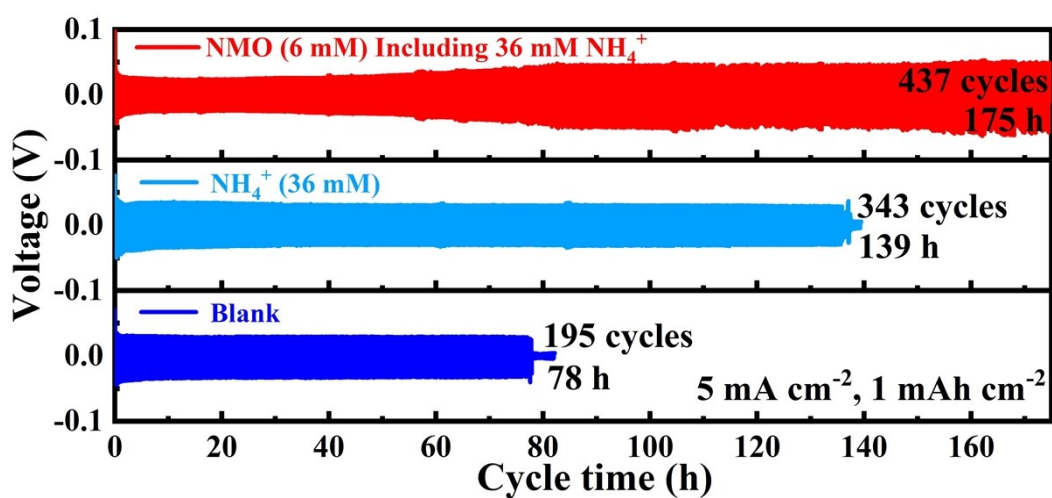

**Figure S8.** Cycling curves of Zn symmetric cells in blank electrolyte and electrolytes with NMO additive and  $(\text{NH}_4)_2\text{SO}_4$  additive, respectively.

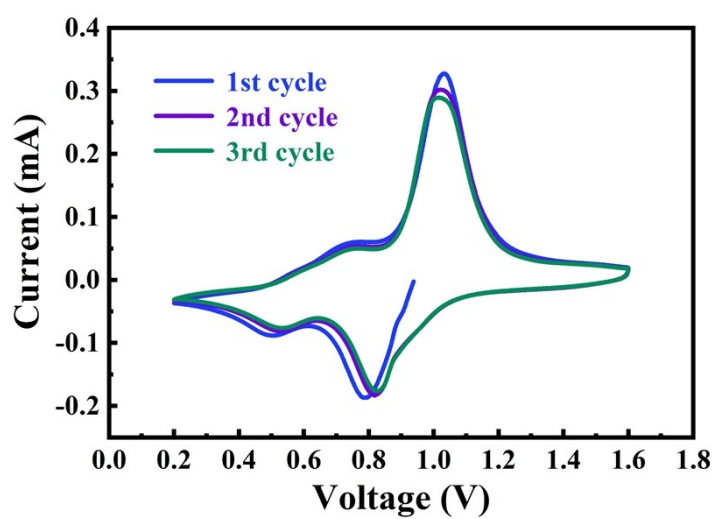

**Figure S9.** Cyclic voltammety (CV) curves of the Zn/NVO full cells using blank electrolytes at  $1 \text{ mV s}^{-1}$ .

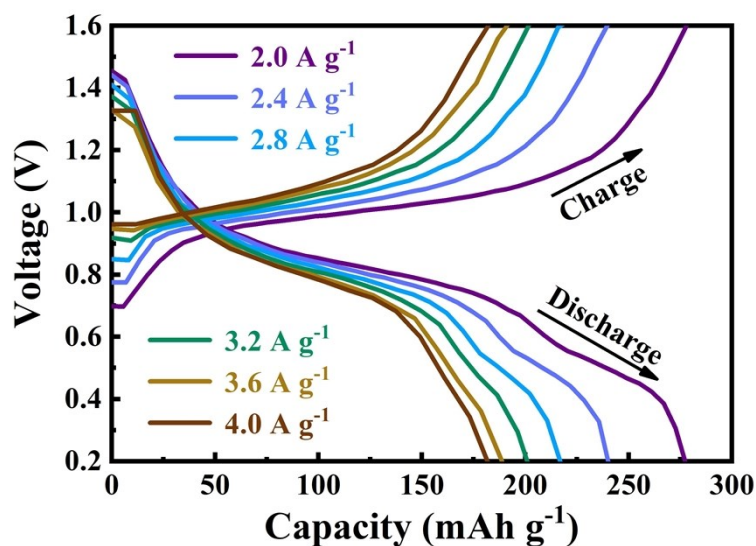

**Figure S10.** Discharge/charge curves of Zn/NVO full cells from 2000 mA g<sup>-1</sup> to 4000 mA g<sup>-1</sup> using blank electrolytes.

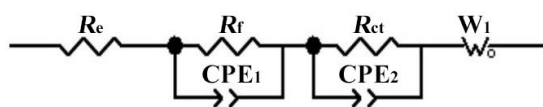

**Figure S11.** The equivalent circuits corresponding to figure 5d.

**Table S2.** The fitting results of the simulated equivalent circuit.

|          | NMO   | Error (%) | Blank | Error (%) |
|----------|-------|-----------|-------|-----------|
| $R_e$    | 5.057 | 3.225     | 2.181 | 3.422     |
| $R_f$    | 4.266 | 9.343     | 8.323 | 21.74     |
| $R_{ct}$ | 307.3 | 4.168     | 473.3 | 11.18     |
| Sum      | 316.6 |           | 483.8 |           |

**Table S3.** Comparison of the electrochemical performance of Zn anode in aqueous electrolytes with previous work.

| Main materials                                                        | Current density and areal capacity                | Cycle             | Reference        |
|-----------------------------------------------------------------------|---------------------------------------------------|-------------------|------------------|
| $(\text{NH}_4)_6[\text{Mo}_7\text{O}_{24}] \cdot 4\text{H}_2\text{O}$ | 10 mA cm <sup>-2</sup><br>1 mAh cm <sup>-2</sup>  | <b>568 cycles</b> | <b>This work</b> |
| Zn-X zeolite nanoparticles and Nafion                                 | 1 mA cm <sup>-2</sup><br>10 mAh cm <sup>-2</sup>  | 50 cycles         | [20]             |
| Diethyl ether                                                         | 1 mA cm <sup>-2</sup><br>1 mAh cm <sup>-2</sup>   | 90 cycles         | [22]             |
| Carbon nanotubes                                                      | 1 mA cm <sup>-2</sup><br>2 mAh cm <sup>-2</sup>   | 50 cycles         | [23]             |
| Polyacrylamide                                                        | 2 mA cm <sup>-2</sup><br>4 mAh cm <sup>-2</sup>   | 70 cycles         | [24]             |
| Metallic indium (In)                                                  | 1 mA cm <sup>-2</sup><br>1 mAh cm <sup>-2</sup>   | 250 cycles        | [25]             |
| Polyamide coating layer                                               | 10 mA cm <sup>-2</sup><br>10 mAh cm <sup>-2</sup> | 38 cycles         | [26]             |
| $\text{NaTi}_2(\text{PO}_4)_3$                                        | 1 mA cm <sup>-2</sup><br>1 mAh cm <sup>-2</sup>   | 125 cycles        | [27]             |
| ZIF-8                                                                 | 10 mA cm <sup>-2</sup><br>10 mAh cm <sup>-2</sup> | 200 cycles        | [31]             |
| TiO <sub>2</sub>                                                      | 1 mA cm <sup>-2</sup><br>1 mAh cm <sup>-2</sup>   | 75 cycles         | [33]             |
| Faceted titanium dioxide                                              | 1 mA cm <sup>-2</sup><br>1 mAh cm <sup>-2</sup>   | 230 cycles        | [35]             |



|       |                                                 |            |      |
|-------|-------------------------------------------------|------------|------|
| MXene | 1 mA cm <sup>-2</sup><br>1 mAh cm <sup>-2</sup> | 150 cycles | [36] |
| RGO   | 1 mA cm <sup>-2</sup><br>2 mAh cm <sup>-2</sup> | 50 cycles  | [37] |
